# Supplementary material for: Transcriptome and organellar sequencing highlights the complex origin and diversification of allotetraploid Brassica napus
Source: PubMed Central journal article supplement (PMC6599199; doi:10.1038/s41467-019-10757-1), 2019-06-28
Supplement: 41467_2019_10757_MOESM1_ESM.pdf [file 41467_2019_10757_MOESM1_ESM.pdf]

**Transcriptome and organellar sequencing highlights the complex origin and  
diversification of allotetraploid *Brassica napus***

*An et al.*

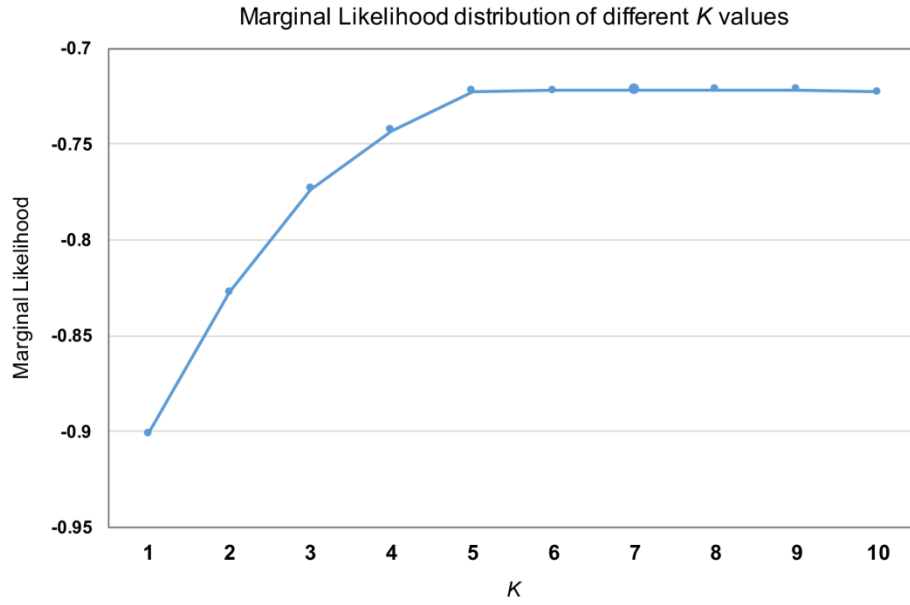

**Supplementary Figure 1. Marginal Likelihood value for different  $K$  values in fastStructure.** Based on Darmor-*bzh* reference genome,  $K=7$  reaches the maximum marginal likelihood value. Source data are provided as a Source Data file.

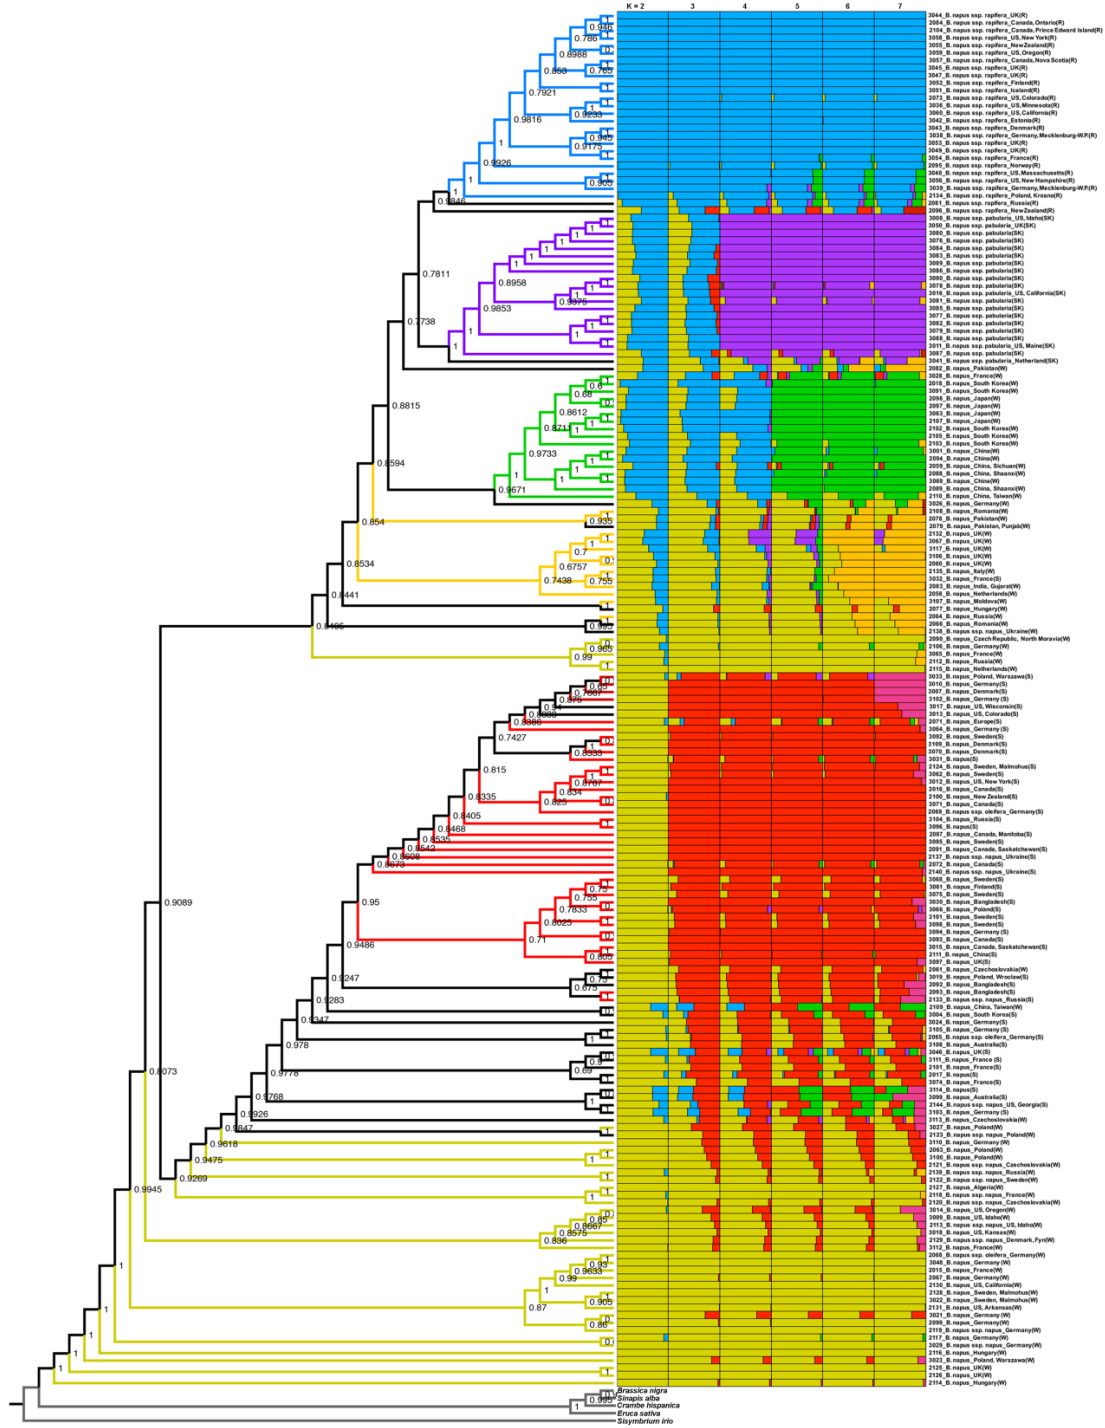

**Supplementary Figure 2. Genetic structure and phylogenetic tree of *B. napus*.** The phylogenetic tree constructed by maximum-likelihood method. Based on Darmor-*bzh* reference genome. Colors indicates different genetic clusters. Yellow: WEAm (winter rapeseed in Europe and America); Red: S (spring rapeseed); Orange: WEA (winter rapeseed in Europe and South Asia); Green: WeA (winter rapeseed in East Asia); Purple: SK (Siberian kale); Blue: R(Rutabaga); Dark pink: IntroS (Introgressed spring rapeseed); Black: genetically diverse accessions; Dark grey: outgroups. Source data are provided as a Source Data file.

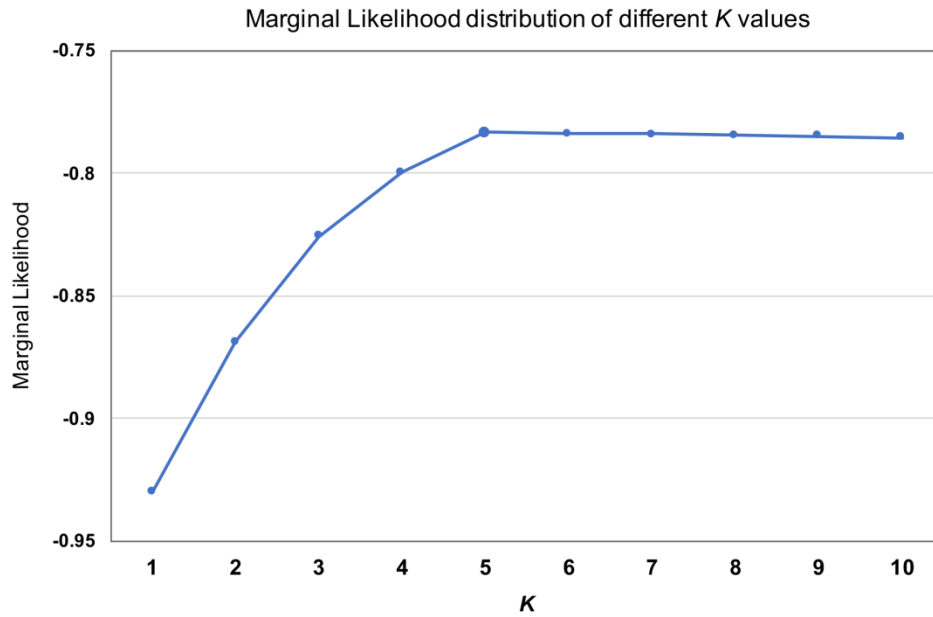

**Supplementary Figure 3. Marginal Likelihood value for different  $K$  values in fastStructure.**

Based on pan-transcriptome,  $K=5$  reaches the maximum marginal likelihood value. Source data are provided as a Source Data file.

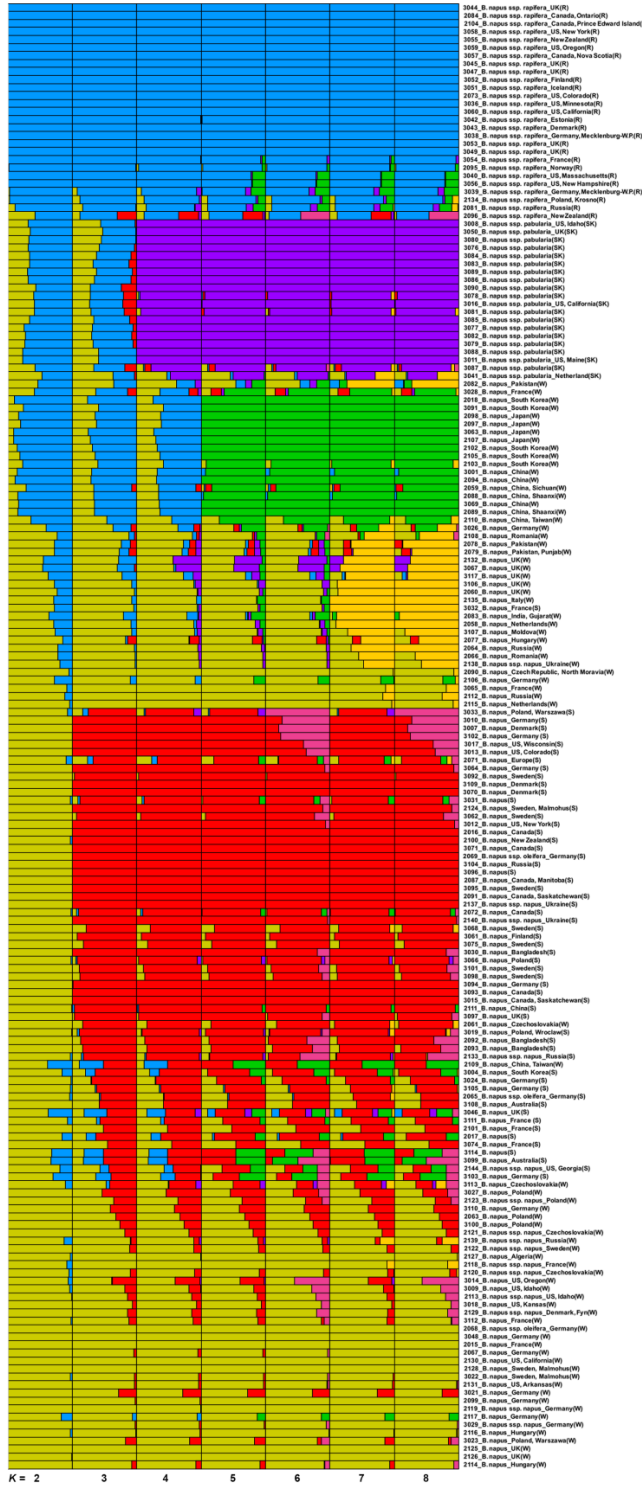

**Supplementary Figure 4. Genetic structure of *B. napus* based on pan-transcriptomes.** Colors indicates different genetic clusters. Yellow: WEAm (winter rapeseed in Europe and America); Red: S (spring rapeseed); Orange: WEsA (winter rapeseed in Europe and South Asia); Green: WeA (winter rapeseed in East Asia); Purple: SK (Siberian kale); Blue: R(Rutabaga); Dark pink: IntroS (Introgressed spring rapeseed). Source data are provided as a Source Data file.

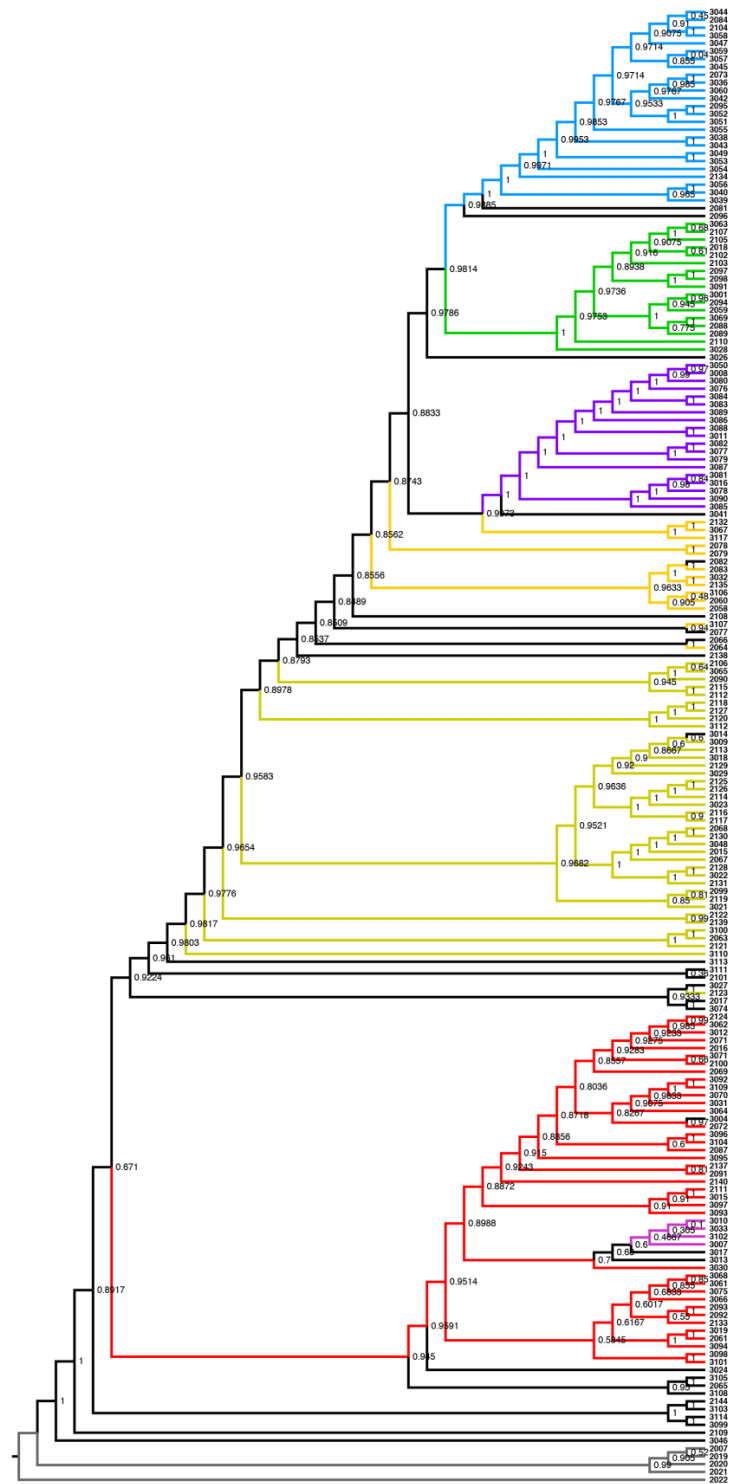

**Supplementary Figure 5. Phylogenetic tree of *B. napus* based on pan-transcriptomes.** The phylogenetic tree constructed by maximum-likelihood method. Colors indicates different genetic clusters. Yellow: WEAm (winter rapeseed in Europe and America); Red: S (spring rapeseed); Orange: WEsA (winter rapeseed in Europe and South Asia); Green: WeA (winter rapeseed in East Asia); Purple: SK (Siberian kale); Blue: R (Rutabaga); Dark pink: IntroS (Introgressed spring rapeseed); Black: genetically diverse accessions; Dark grey: outgroups.

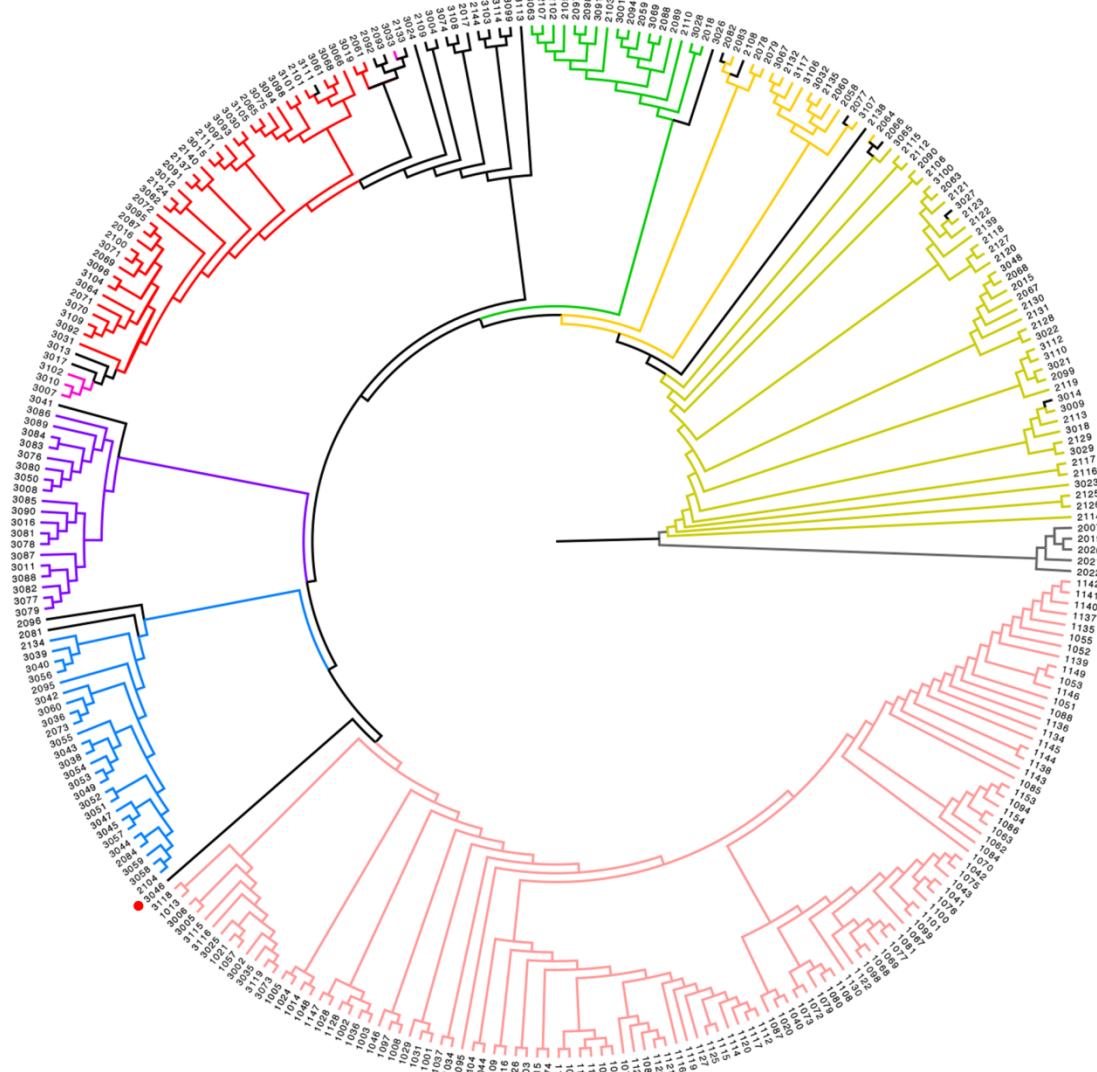

**Supplementary Figure 6. Maximum-likelihood phylogenetic tree constructed among *B. napus* and *B. rapa* based on A sub-genome.** The red spot indicates a newly resynthesized *B. napus* accession. Colors indicates different genetic clusters. Yellow: WEAm (winter rapeseed in Europe and America); Red: S (spring rapeseed); Orange: WEsA (winter rapeseed in Europe and South Asia); Green: WeA (winter rapeseed in East Asia); Purple: SK (Siberian kale); Blue: R (Rutabaga); Dark pink: IntroS (Introgressed spring rapeseed); Pink: *B. rapa*; Black: genetically diverse accessions; Dark grey: outgroups.

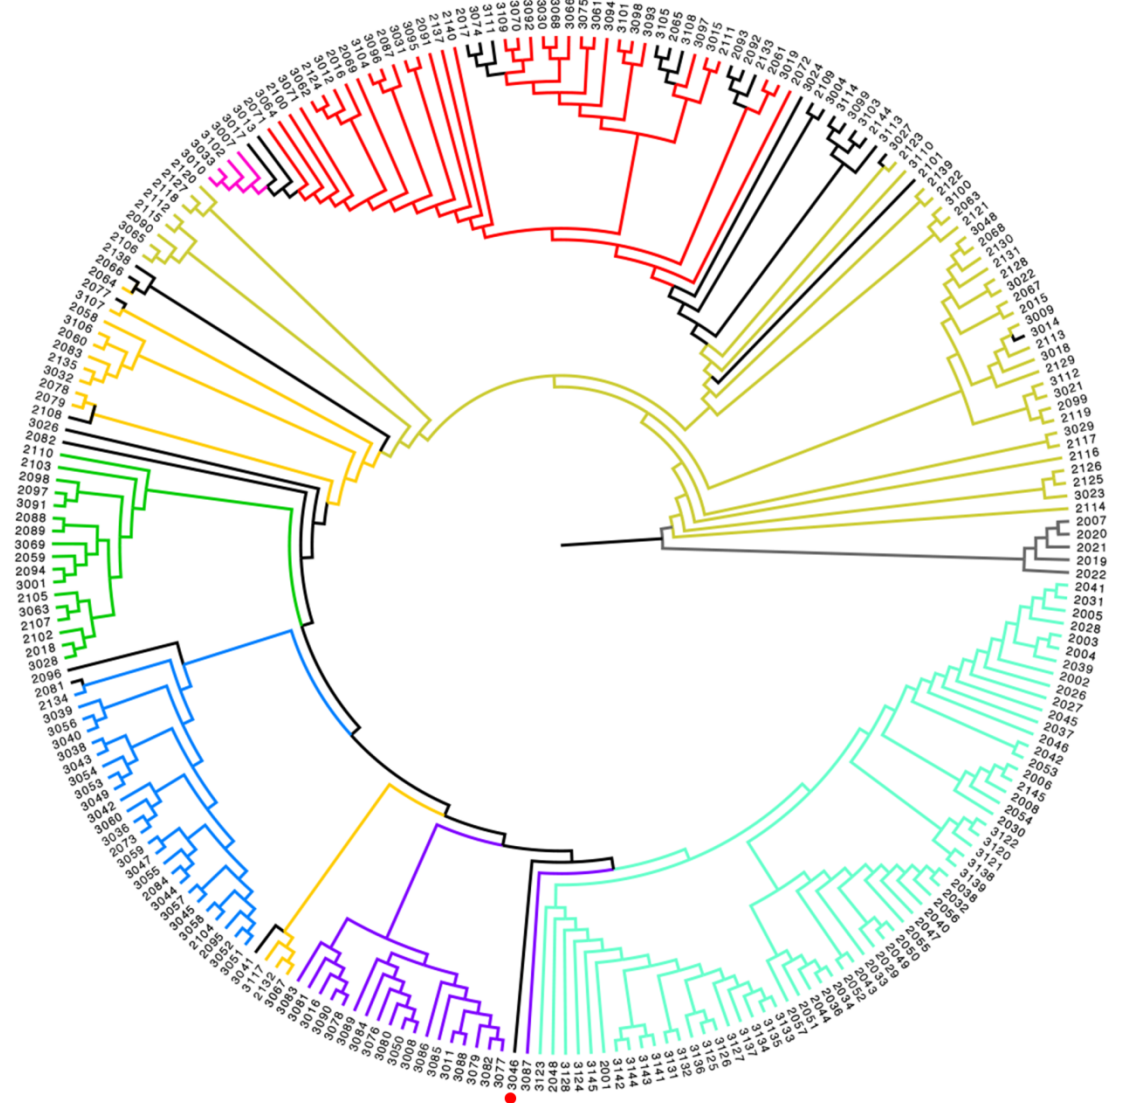

**Supplementary Figure 7. Maximum-likelihood phylogenetic tree constructed among *B. napus*, *B. oleracea* and wild C species based on C sub-genome.** The Red spot indicates a newly resynthesized *B. napus* accession. Colors indicates different genetic clusters. Yellow: WEAm (winter rapeseed in Europe and America); Red: S (spring rapeseed); Orange: WEsA (winter rapeseed in Europe and South Asia); Green: WeA (winter rapeseed in East Asia); Purple: SK (Siberian kale); Blue: R (Rutabaga); Dark pink: IntroS (Introgressed spring rapeseed); Light blue: *B. oleracea* and wild C species; Black: genetically diverse accessions; Dark grey: outgroups.



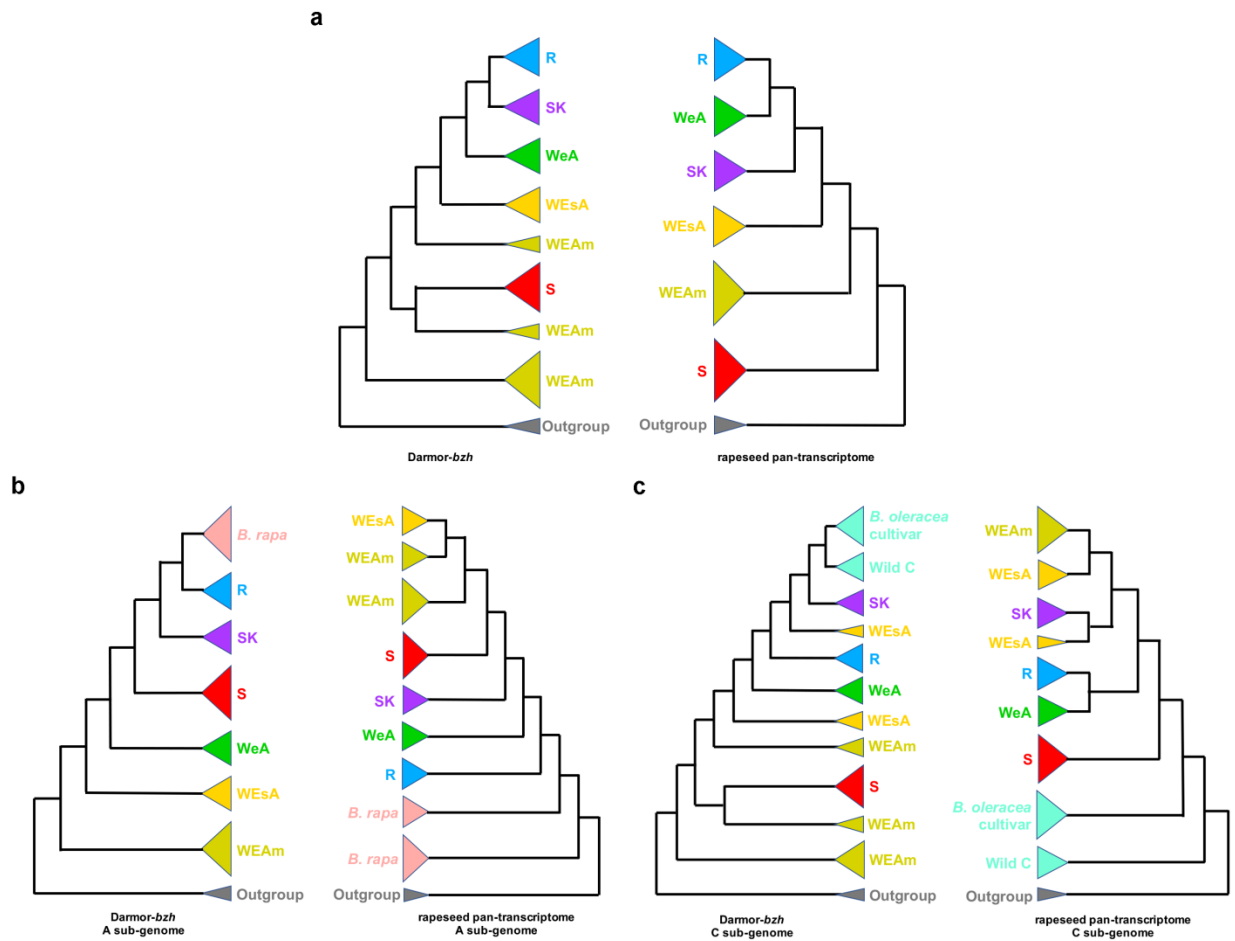

**Supplementary Figure 8. Comparison of phylogenetic trees constructed based on Darmor-*bzh* genome and rapeseed pan-transcriptome. a** comparison of *B. napus* phylogeny. **b** comparison of A sub-genome phylogeny. **c** comparison of C sub-genome phylogeny. Colors indicates different genetic clusters. Yellow: WEAm (winter rapeseed in Europe and America); Red: S (spring rapeseed); Orange: WEsA (winter rapeseed in Europe and South Asia); Green: WeA (winter rapeseed in East Asia); Purple: SK (Siberian kale); Blue: R (Rutabaga); Pink: *B. rapa*; Light blue: *B. oleracea* and wild C species; Dark grey: outgroups. Note: clades were simplified from full phylogenies for the purpose of comparison.

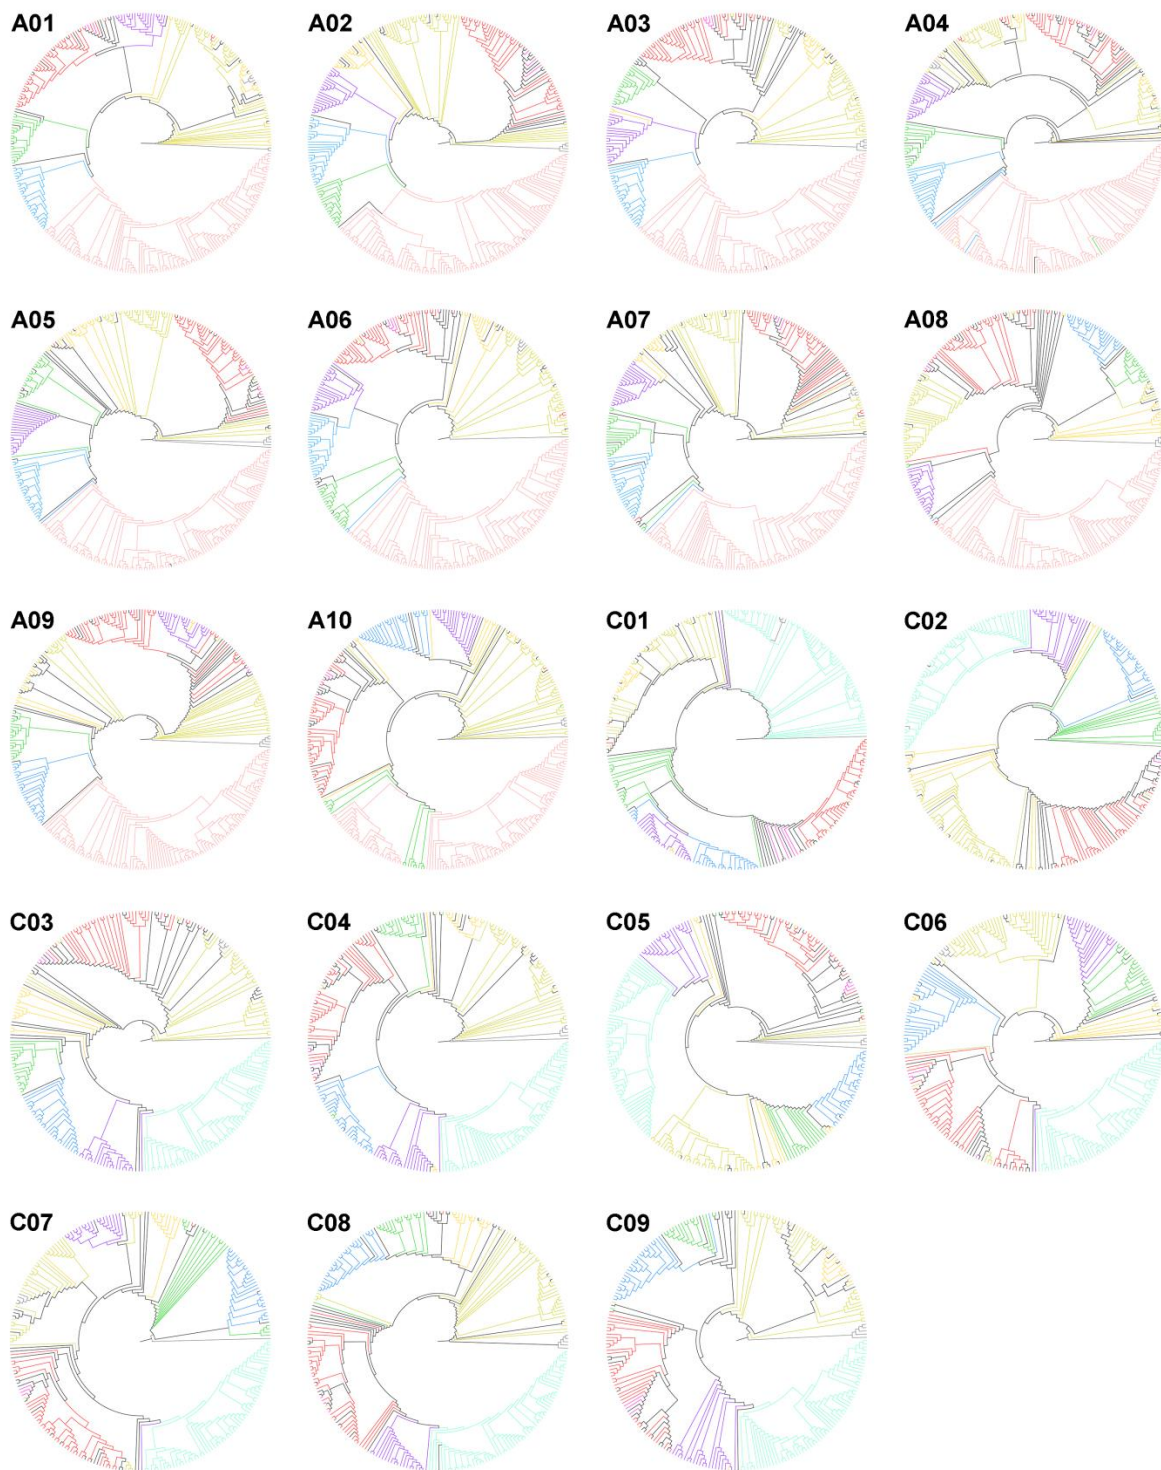

**Supplementary Figure 9. Maximum-likelihood phylogenetic tree constructed among *B. napus* and its progenitors based on each chromosome.** Colors indicates different genetic clusters. Yellow: WEAm (winter rapeseed in Europe and America); Red: S (spring rapeseed); Orange: WEsA (winter rapeseed in Europe and South Asia); Green: WeA (winter rapeseed in East Asia); Purple: SK (Siberian kale); Blue: R (Rutabaga); Black: genetically diverse accessions; Dark grey: outgroups.

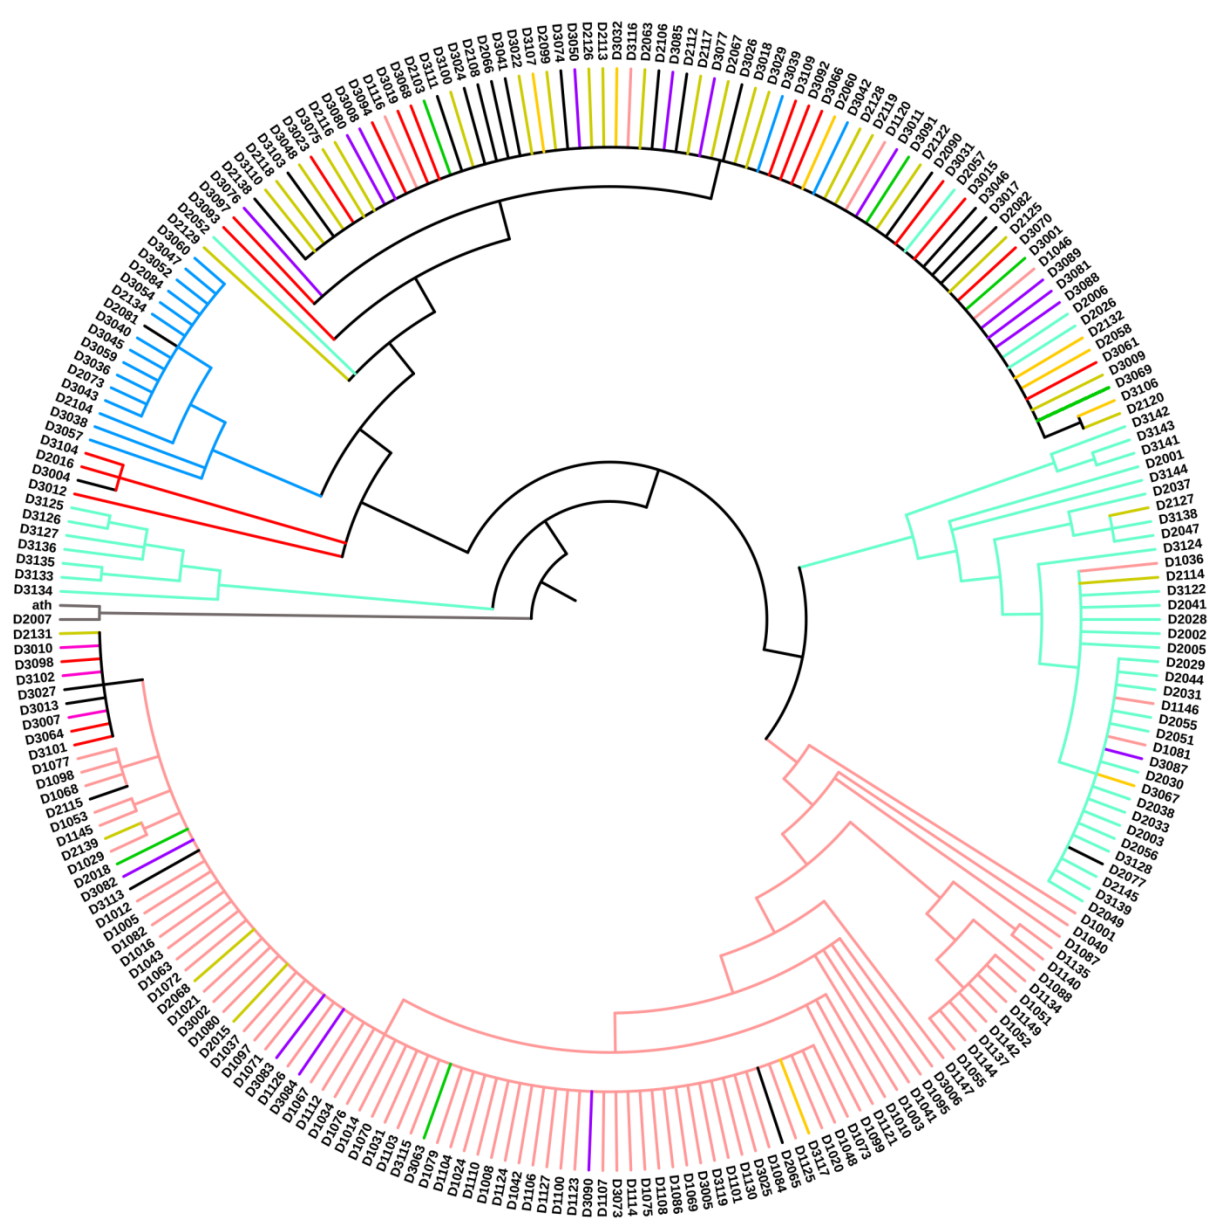

**Supplementary Figure 10. Maximum-likelihood phylogenetic tree constructed among *B. napus* and all its progenitor species (*B. rapa*, *B. oleracea* and wild C species) using 62 chloroplast single copy regions homolog genes. ath, *Arabidopsis thaliana*. Colors indicates different genetic clusters. Yellow: WEAm (winter rapeseed in Europe and America); Red: S (spring rapeseed); Orange: WEsA (winter rapeseed in Europe and South Asia); Green: WeA (winter rapeseed in East Asia); Purple: SK (Siberian kale); Blue: R (Rutabaga); Black: genetically diverse accessions; Dark grey, outgroups.**

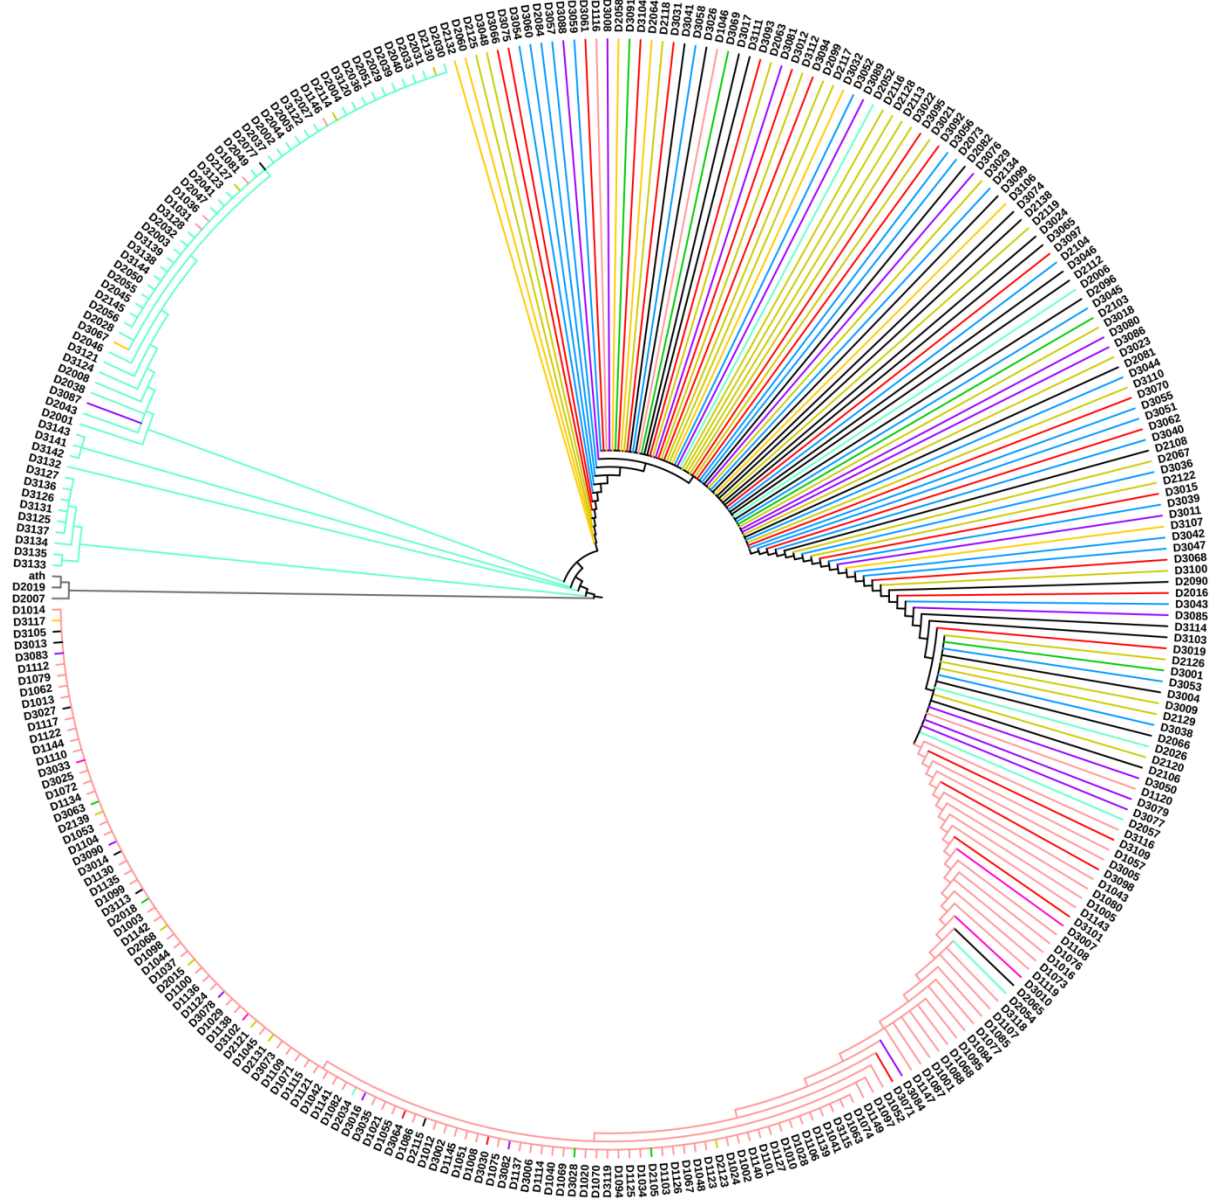

**Supplementary Figure 11. Maximum-likelihood phylogenetic tree constructed among *B. napus* and all its progenitor species using 42 mitochondrial homolog genes. ath, *Arabidopsis thaliana*. Colors indicates different genetic clusters. Yellow: WEAm (winter rapeseed in Europe and America); Red: S (spring rapeseed); Orange: WEsA (winter rapeseed in Europe and South Asia); Green: WeA (winter rapeseed in East Asia); Ppurple: SK (Siberian kale); Blue: R (Rutabaga); Black: genetically diverse accessions; Dark grey, outgroups.**

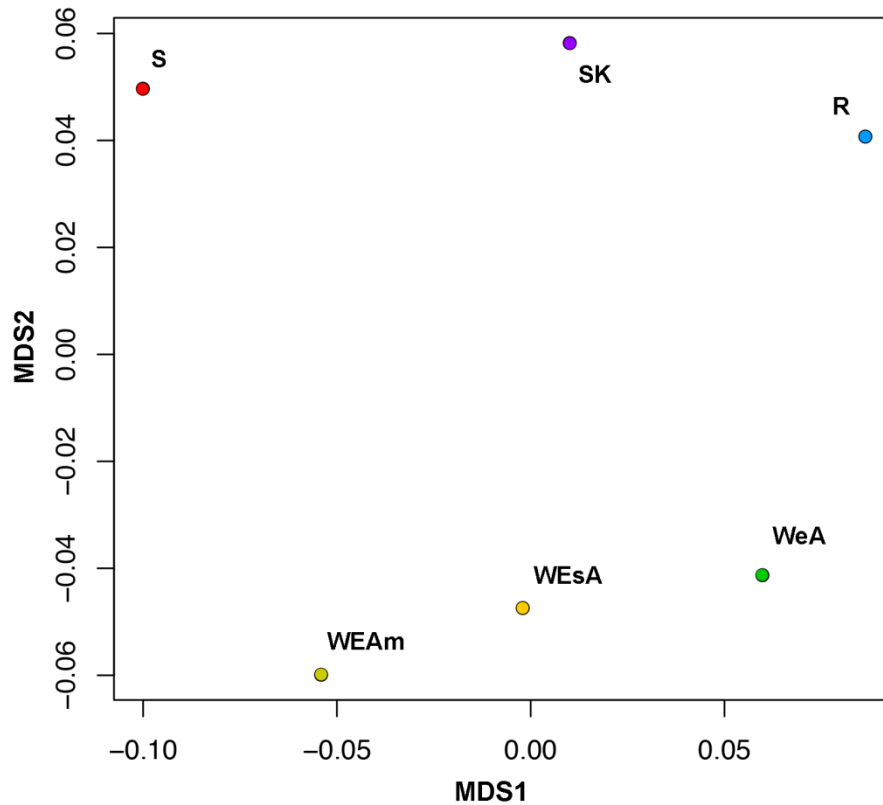

**Supplementary Figure 12. Multidimensional scaling (MDS) plot for pairwise  $F_{ST}$  matrix among 6 genetic clusters.** WEAm: Winter rapeseed in Europe and America; WEsA: Winter rapeseed in Europe and South Asia; S: Spring rapeseed; SK: Siberian kale; R: Rutabaga; WeA: Winter rapeseed in East Asia.

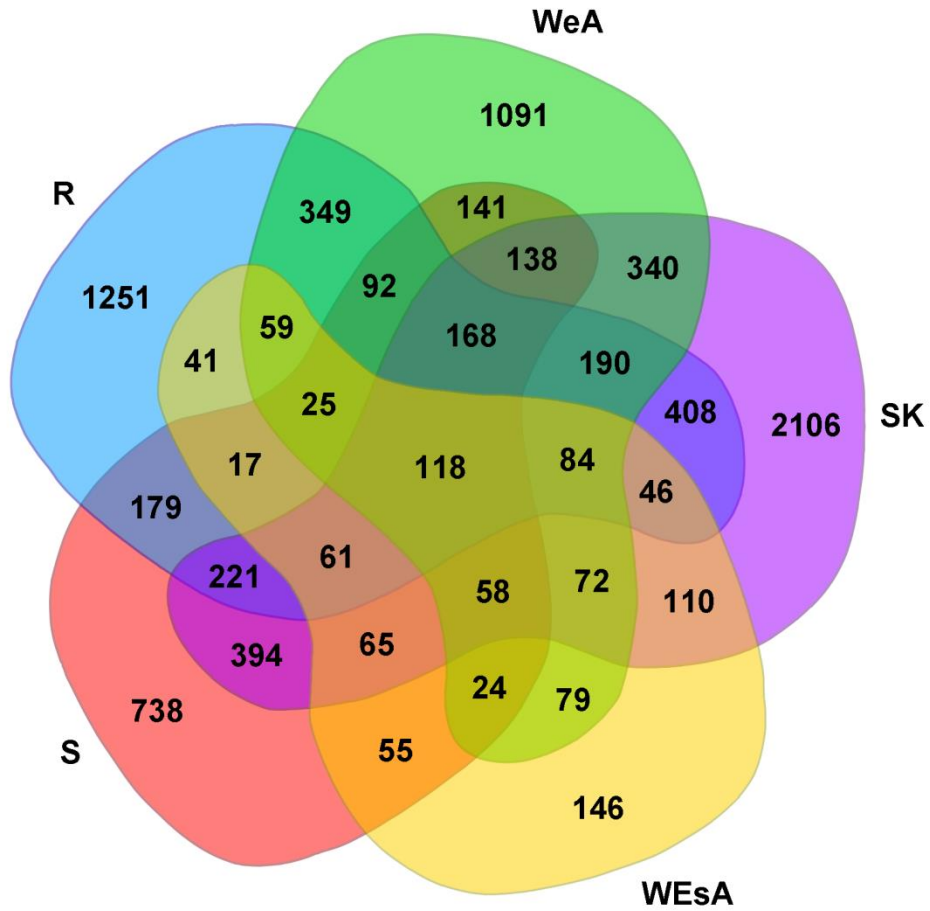

**Supplementary Figure 13. The summary of Differential Expressed Genes (DEGs) based on rapeseed pan-transcriptome reference.** WEsA: Winter rapeseed in Europe and South Asia; S: Spring rapeseed; SK: Siberian kale; R: Rutabaga; WeA: Winter rapeseed in East Asia.

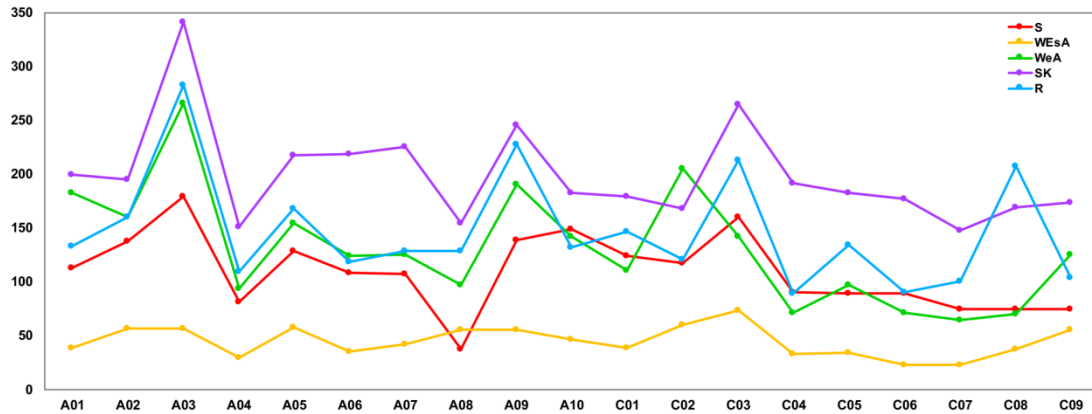

**Supplementary Figure 14. Summary of Differentially expressed genes (DEGs) numbers on each chromosome.** x axis shows the chromosome name in *B. napus*; y axis shows the DEGs number. S: Spring rapeseed; WEsA: Winter rapeseed in Europe and South Asia; WEAm: winter rapeseed in Europe and America; WeA: Winter rapeseed in East Asia; SK: Siberian kale; R: Rutabaga. Source data are provided as a Source Data file.

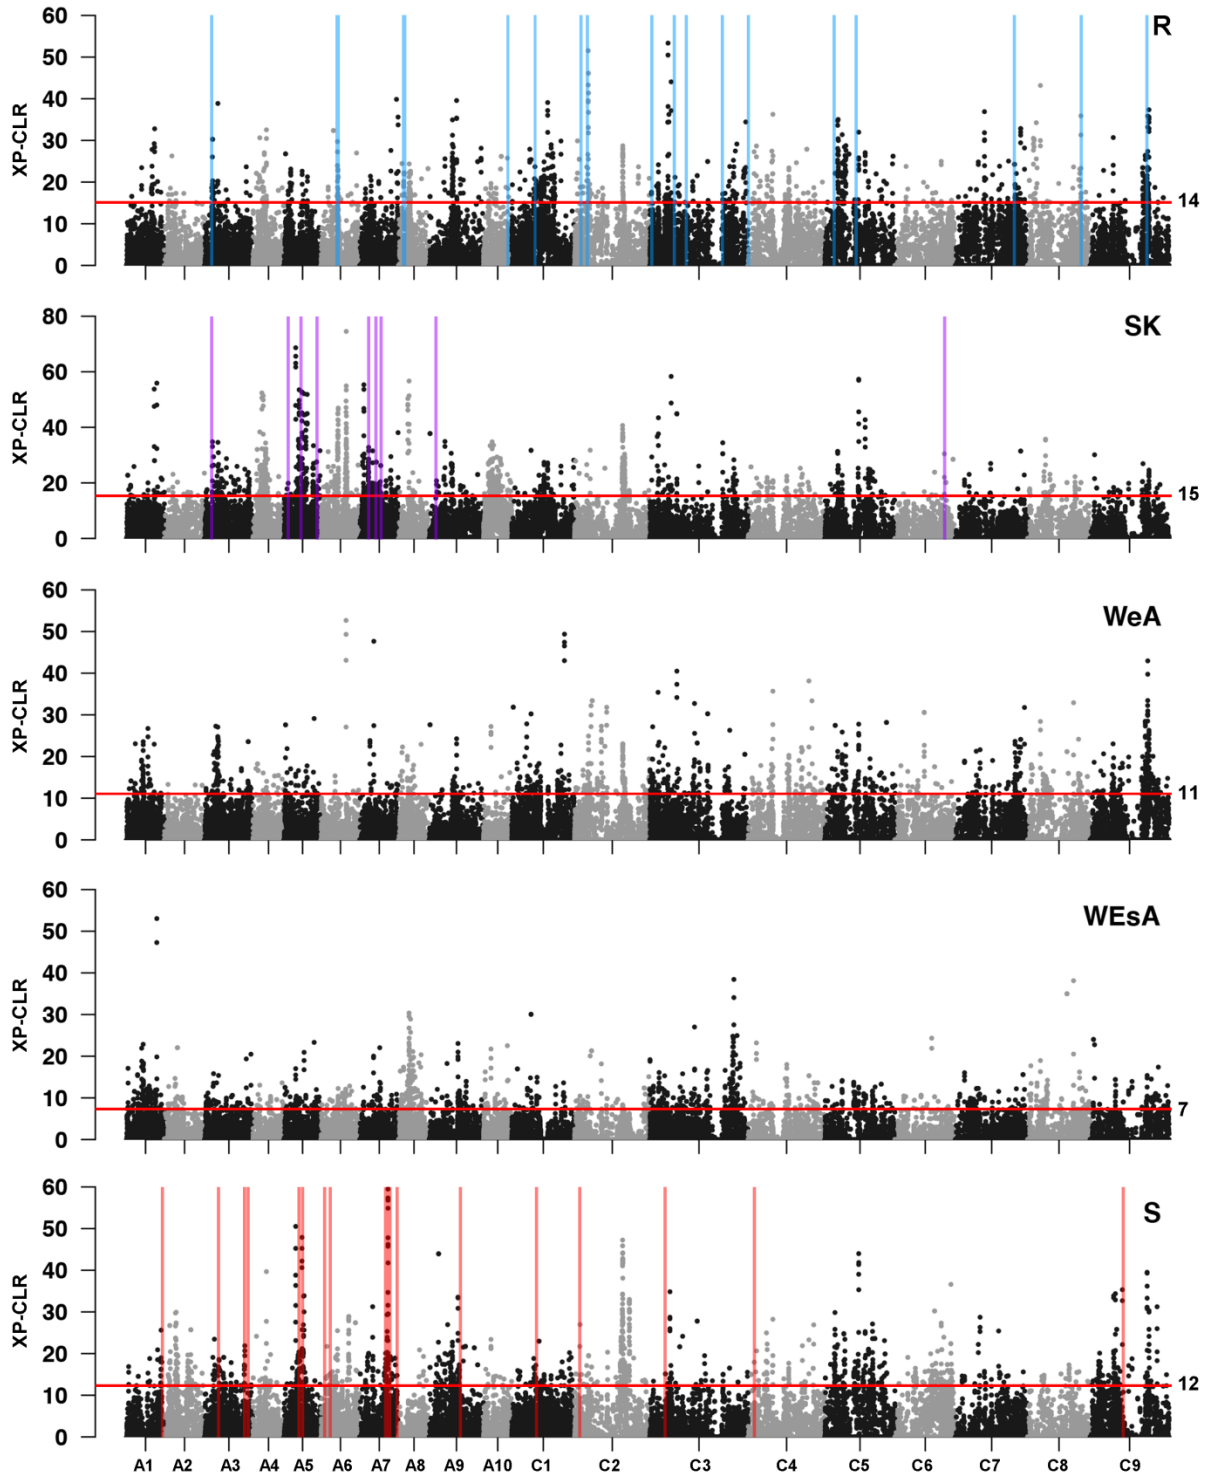

**Supplementary Figure 15. Genome wide distributions of selective sweep among 5 genetic clusters based on XP-CLR.** Red line: top 5% XP-CLR score; values marked on the right side. R: Rutabaga; SK: Siberian kale; WeA: Winter rapeseed in East Asia; WEsA: Winter rapeseed in Europe and South Asia; S: Spring rapeseed. Colored rectangle showed the selective sweeps with genes and candidate genes functioned in R, SK and S diversification.



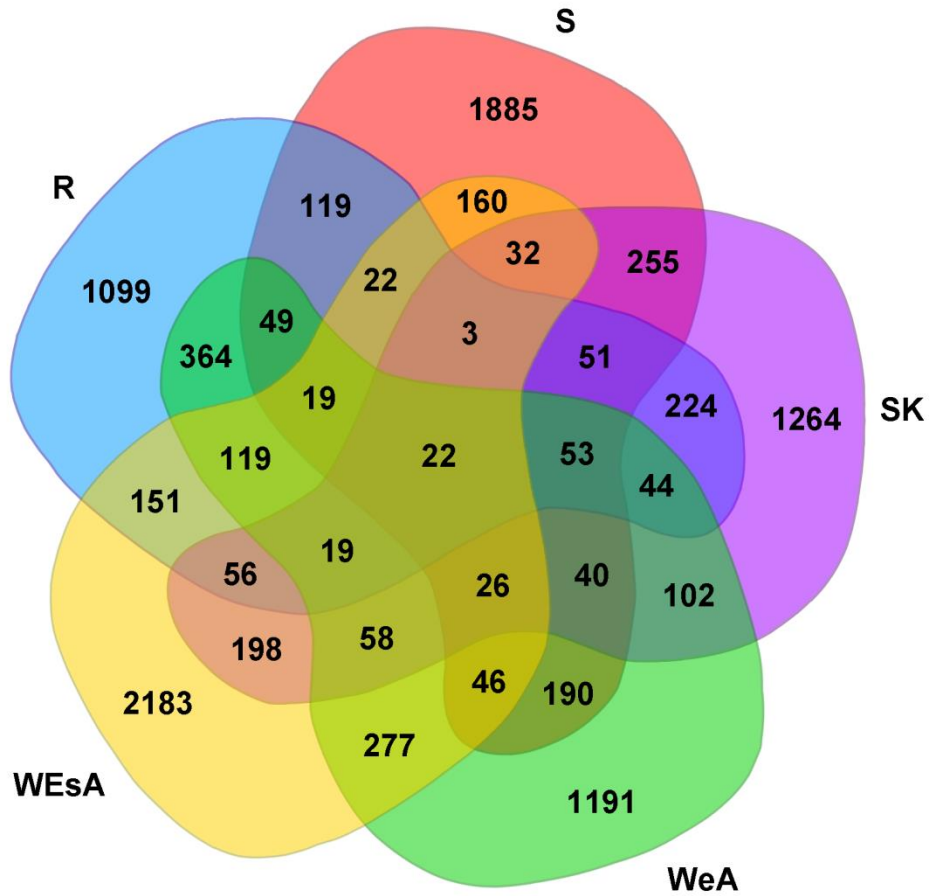

**Supplementary Figure 16. The summary of genes under selective sweep among the five genetic clusters.** WEsA: Winter rapeseed in Europe and South Asia; S: Spring rapeseed; SK: Siberian kale; R: Rutabaga; WeA: Winter rapeseed in East Asia.

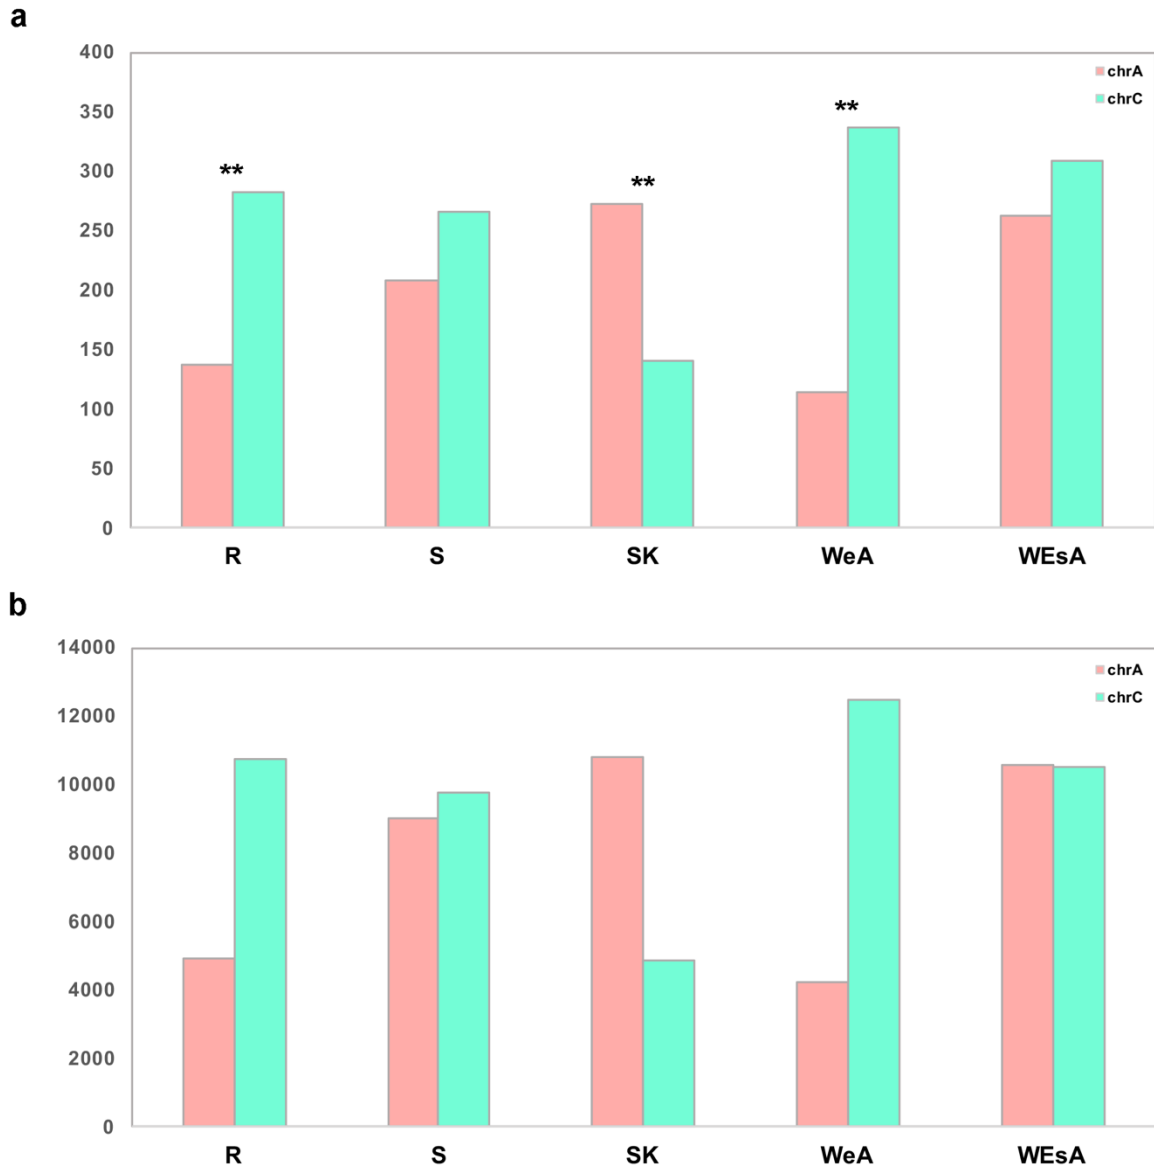

**Supplementary Figure 17. The distribution of selective sweep regions in A and C sub-genome. a** The number distribution of selective sweep regions. \*\*, p-value < 0.01 ( $X^2$  test). **b** The length distribution of selective sweep regions. The unit for Y-axis is kb. WEsA: Winter rapeseed in Europe and South Asia; S: Spring rapeseed; SK: Siberian kale; R: Rutabaga; WeA: Winter rapeseed in East Asia. Source data are provided as a Source Data file.

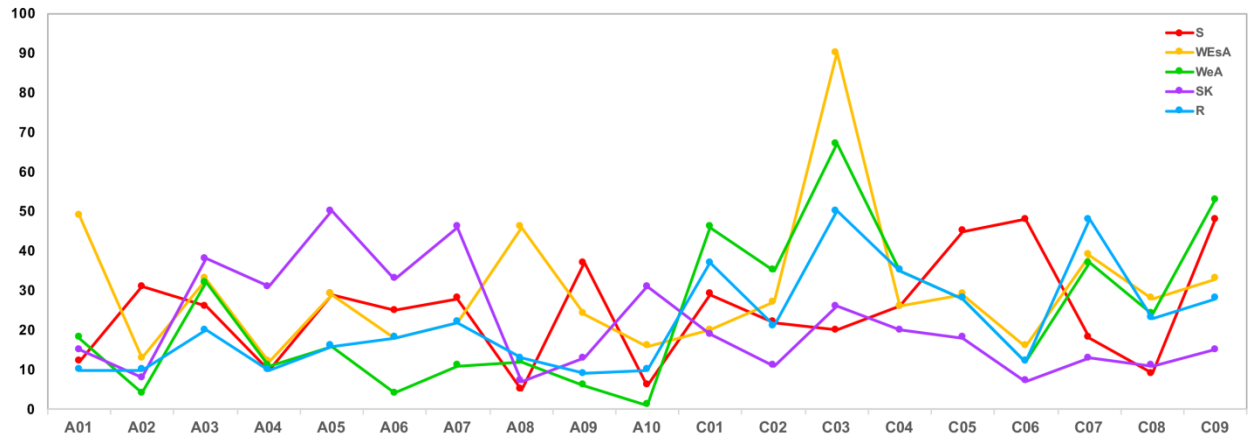

**Supplementary Figure 18. Summary of selective sweep regions in each chromosome.** Y-axis is the number of selective sweep regions. S: Spring rapeseed; WEsA: Winter rapeseed in Europe and South Asia; WeA: Winter rapeseed in East Asia; SK: Siberian kale; R: Rutabaga. Source data are provided as a Source Data file.

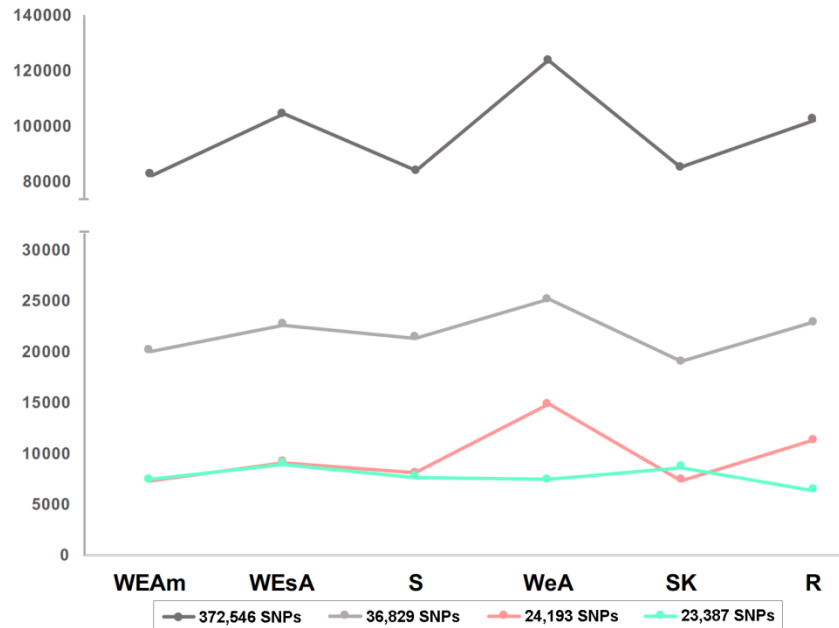

**Supplementary Figure 19. Summary of SNPs number in each genetic clusters of the four SNPs dataset used in this study.** The order of the x-axis shows the increasing divergence of the genetic clusters compare to WEAm. WEAm: Winter rapeseed in Europe and America; S: Spring rapeseed; WEsA: Winter rapeseed in Europe and South Asia; WeA: Winter rapeseed in East Asia; SK: Siberian kale; R: Rutabaga.

**Supplementary Table 1.** Single nucleotide polymorphism (SNP) distribution in all *B. napus* accessions.

| <b>Chr</b> | <b>SNPs</b> | <b>Density(per kb)</b> | <b>Chr</b> | <b>SNPs</b> | <b>Density(per kb)</b> |
|------------|-------------|------------------------|------------|-------------|------------------------|
| chrA01     | 21,954      | 0.944                  | chrC01     | 15,028      | 0.387                  |
| chrA02     | 17,419      | 0.703                  | chrC02     | 13,240      | 0.286                  |
| chrA03     | 32,158      | 1.080                  | chrC03     | 28,317      | 0.467                  |
| chrA04     | 15,073      | 0.787                  | chrC04     | 16,576      | 0.339                  |
| chrA05     | 21,987      | 0.953                  | chrC05     | 17,511      | 0.405                  |
| chrA06     | 25,593      | 1.049                  | chrC06     | 13,559      | 0.364                  |
| chrA07     | 20,636      | 0.860                  | chrC07     | 15,587      | 0.348                  |
| chrA08     | 16,113      | 0.850                  | chrC08     | 15,863      | 0.412                  |
| chrA09     | 29,627      | 0.875                  | chrC09     | 17,701      | 0.365                  |
| chrA10     | 18,604      | 1.069                  |            |             |                        |
| <hr/>      |             |                        |            |             |                        |
| Total      | 219,164     |                        | Total      | 153,382     |                        |

**Supplementary Table 2.** Mean pairwise  $F_{ST}$  among each genetic cluster

|             | <b>WEAm</b> | <b>S</b> | <b>WEsA</b> | <b>SK</b> | <b>WeA</b> | <b>R</b> |
|-------------|-------------|----------|-------------|-----------|------------|----------|
| <b>WEAm</b> |             | 0.148    | 0.077       | 0.165     | 0.157      | 0.183    |
| <b>S</b>    |             |          | 0.158       | 0.178     | 0.191      | 0.198    |
| <b>WEsA</b> |             |          |             | 0.131     | 0.103      | 0.150    |
| <b>SK</b>   |             |          |             |           | 0.163      | 0.168    |
| <b>WeA</b>  |             |          |             |           |            | 0.140    |
| <b>R</b>    |             |          |             |           |            |          |

WEsA: Winter rapeseed in Europe and South Asia; S: Spring rapeseed; SK: Siberian kale; R: Rutabaga; WeA: Winter rapeseed in East Asia; WEAm: winter rapeseed in Europe and America.

**Supplementary Table 3.** Summary of differentially expressed genes between WEAm and other genetic clusters

| <b>Genetic cluster</b> | <b>Total DEGs</b> | <b>Total up-regulated</b> | <b>Total down-regulated</b> | <b>Unique DEGs</b> | <b>Unique up-regulated</b> | <b>Unique down-regulated</b> |
|------------------------|-------------------|---------------------------|-----------------------------|--------------------|----------------------------|------------------------------|
| S                      | 2,337             | 592                       | 1,745                       | 688                | 188                        | 500                          |
| WEsA                   | 956               | 294                       | 662                         | 151                | 48                         | 103                          |
| WeA                    | 2,773             | 723                       | 2,050                       | 914                | 256                        | 658                          |
| SK                     | 4,269             | 1,327                     | 2,942                       | 1,946              | 732                        | 1,214                        |
| R                      | 3,093             | 754                       | 2,339                       | 1,165              | 309                        | 856                          |

WEsA: Winter rapeseed in Europe and South Asia; S: Spring rapeseed; SK: Siberian kale; R: Rutabaga; WeA: Winter rapeseed in East Asia; WEAm: winter rapeseed in Europe and America.

**Supplementary Table 4.** Mean value of nucleotide diversity in different subgroups based on A and C sub-genome

| <b>Cluster</b> | <b>A sub-genome</b> | <b>C sub-genome</b> |
|----------------|---------------------|---------------------|
| WEAm           | 4.944e-05           | 2.822e-05           |
| WEsA           | 6.256e-05           | 3.424e-05           |
| S              | 5.241e-05           | 2.635e-05           |
| SK             | 4.521e-05           | 3.332e-05           |
| WeA            | 8.677e-05           | 2.760e-05           |
| R              | 7.234e-05           | 2.271e-05           |

WEsA: Winter rapeseed in Europe and South Asia, S: Spring rapeseed; SK: Siberian kale; R: Rutabaga; WeA: Winter rapeseed in East Asia; WEAm: winter rapeseed in Europe and America.



**Supplementary Table 5.** Selected candidate genes for rutabaga diversification.

| <b>Chr</b> | <b>Start</b> | <b>End</b> | <b>Gene</b>          | <b>Br/Bo Homolog</b> | <b>Ath Homolog</b> | <b>Function</b>                                                         | <b>Description</b>                                                           |
|------------|--------------|------------|----------------------|----------------------|--------------------|-------------------------------------------------------------------------|------------------------------------------------------------------------------|
| A03        | 4400001      | 4510000    | <i>BnaA03g09810D</i> | <i>Bra006773</i>     | <i>AT5G58320</i>   | Kinase interacting (KIP1-like) family protein                           | expressed in the epidermis of the root meristem and the early expansion zone |
| A06        | 10330001     | 10370000   | <i>BnaA06g18130D</i> | <i>Bra018219</i>     | <i>AT3G46200</i>   | nudix hydrolase homolog 9                                               | modulation of protein N-glycosylation in the roots                           |
| A06        | 10450001     | 10530000   | <i>BnaA06g18280D</i> | <i>Bra038270</i>     | <i>AT3G45890</i>   | root UVB sensitive-like protein (Protein of unknown function%2C DUF647) | Cheng <i>et al.</i> 2016 <sup>1</sup>                                        |
| A08        | 3300001      | 3360000    | <i>BnaA08g04000D</i> | .                    | <i>AT1G47240</i>   | NRAMP metal ion transporter 2                                           | root morphogenesis; Mutation impaired root growth                            |
| A10        | 14960001     | 14990000   | <i>BnaA10g22000D</i> | <i>Bra009047</i>     | <i>AT5G10250</i>   | Phototropic-responsive NPH3 family protein                              | mutants have defects in primary root growth                                  |
| C01        | 13260001     | 13340000   | <i>BnaC01g19230D</i> | <i>Bo1g047910</i>    | <i>AT4G27060</i>   | ARM repeat superfamily protein                                          | the orientation of cortical microtubules and the direction of organ growth   |
| C02        | 3260001      | 3290000    | <i>BnaC02g06130D</i> | <i>Bo2g012660</i>    | <i>AT5G15600</i>   | SPIRAL1-like4                                                           | mutant result of defective anisotropic cell expansion                        |
| C02        | 8100001      | 8130000    | <i>BnaC02g12760D</i> | <i>Bo2g037670</i>    | <i>AT5G55910</i>   | D6 protein kinase                                                       | basipetal auxin transport                                                    |
| C03        | 1070001      | 1100000    | <i>BnaC03g02240D</i> | <i>Bo3g003470</i>    | <i>AT5G05730</i>   | anthranilate synthase alpha subunit 1                                   | forms a link between ethylene signaling and auxin synthesis in roots         |
| C03        | 14330001     | 14360000   | <i>BnaC03g25570D</i> | <i>Bo4g196030</i>    | <i>AT2G46070</i>   | mitogen-activated protein kinase 12                                     | negative regulator of auxin signaling                                        |
| C03        | 14330001     | 14360000   | <i>BnaC03g25580D</i> | <i>Bo3g039070</i>    | <i>AT2G46070</i>   | mitogen-activated protein kinase 12                                     | negative regulator of auxin signaling                                        |
| C03        | 14330001     | 14360000   | <i>BnaC03g25590D</i> | <i>Bo3g039070</i>    | <i>AT2G46070</i>   | mitogen-activated protein kinase 12                                     | negative regulator of auxin signaling                                        |

|     |          |          |                      |                   |                  |                                                                          |                                                          |
|-----|----------|----------|----------------------|-------------------|------------------|--------------------------------------------------------------------------|----------------------------------------------------------|
| C03 | 23410001 | 23460000 | <i>BnaC03g38180D</i> | <i>Bo3g065780</i> | <i>AT3G13870</i> | Root hair defective 3 GTP-binding protein (RHD3)                         | Cheng <i>et al.</i> 2016 <sup>1</sup>                    |
| C03 | 44900001 | 44930000 | <i>BnaC03g55810D</i> | .                 | <i>AT3G46200</i> | nudix hydrolase homolog 9                                                | modulation of protein N-glycosylation in the roots       |
| C03 | 57580001 | 57650000 | <i>BnaC03g67970D</i> | <i>Bo3g175620</i> | <i>AT4G30290</i> | xyloglucan endotransglucosylase/hydrolase 19                             | cellular response to auxin stimulus regions              |
| C05 | 6290001  | 6340000  | <i>BnaC05g10910D</i> | <i>Bo5g019970</i> | <i>AT1G14740</i> | class I heat shock protein%2C putative (DUF1423)                         | MP-dependent embryonic root meristem initiation          |
| C05 | 18300001 | 18330000 | <i>BnaC05g24110D</i> | <i>Bo5g048360</i> | <i>AT1G31930</i> | extra-large GTP-binding protein 3                                        | regulation of root morphological and growth responses    |
| C07 | 36720001 | 36830000 | <i>BnaC07g33750D</i> | <i>Bo7g104490</i> | <i>AT4G16515</i> | root meristem growth factor                                              | root meristem growth factor                              |
| C08 | 32690001 | 32820000 | <i>BnaC08g34590D</i> | <i>Bo8g100610</i> | <i>AT2G23140</i> | RING/U-box superfamily protein with ARM repeat domain-containing protein | root development, root meristem                          |
| C09 | 32620001 | 32650000 | <i>BnaC09g29880D</i> | <i>Bo9g111400</i> | <i>AT5G53540</i> | P-loop containing nucleoside triphosphate hydrolases superfamily protein | promotion of root distal stem cell (DSC) differentiation |
| C09 | 35000001 | 35080000 | <i>BnaC09g32060D</i> | <i>Bo9g120690</i> | <i>AT5G55540</i> | tornado 1                                                                | radial pattern of tissue differentiation in the root     |

“.”: No corresponding gene identified.

**Supplementary Table 6.** Selected candidate genes for Siberian kale diversification.

| <b>Chr</b> | <b>Start</b> | <b>End</b> | <b>Gene</b>          | <b>Br/Bo Homolog</b> | <b>Ath Homolog</b> | <b>Function</b>                                    | <b>Description</b>                                      |
|------------|--------------|------------|----------------------|----------------------|--------------------|----------------------------------------------------|---------------------------------------------------------|
| A03        | 790001       | 870000     | <i>BnaA03g01760D</i> | <i>Bra005867</i>     | <i>AT5G05780</i>   | RP non-ATPase subunit 8A                           | leaf adaxial identity                                   |
| A05        | 2560001      | 2590000    | <i>BnaA05g04870D</i> | <i>Bra004913</i>     | <i>AT2G45450</i>   | binding protein                                    | leaf polarity; adaxial/abaxial axis specification       |
| A05        | 11260001     | 11320000   | <i>BnaA05g16600D</i> | <i>Bra033869</i>     | <i>AT1G31880</i>   | DZC domain containing protein                      | Cheng <i>et al.</i> 2016 <sup>1</sup>                   |
| A05        | 19150001     | 19190000   | <i>BnaA05g26050D</i> | <i>Bra034692</i>     | <i>AT3G13300</i>   | Transducin/WD40 repeat-like superfamily protein    | cellular response to auxin stimulus                     |
| A05        | 19150001     | 19190000   | <i>BnaA05g26060D</i> | <i>Bra034693</i>     | <i>AT3G13300</i>   | Transducin/WD40 repeat-like superfamily protein    | cellular response to auxin stimulus                     |
| A07        | 5200001      | 5230000    | <i>BnaA07g04790D</i> | <i>Bra015131</i>     | <i>AT3G25520</i>   | ribosomal protein L5                               | adaxial/abaxial pattern specification                   |
| A07        | 8870001      | 8930000    | <i>BnaA07g08860D</i> | <i>Bra030038</i>     | <i>AT1G27340</i>   | Galactose oxidase/kelch repeat superfamily protein | leaf morphology; regulation of auxin mediated signaling |
| A07        | 8870001      | 8930000    | <i>BnaA07g08880D</i> | <i>Bra030037</i>     | <i>AT1G27320</i>   | histidine kinase 3                                 | cytokinin-mediated leaf longevity                       |
| A07        | 11550001     | 11690000   | <i>BnaA07g13040D</i> | <i>Bra012034</i>     | <i>AT2G27100</i>   | C2H2 zinc-finger protein SERRATE (SE)              | adaxial/abaxial pattern formation                       |
| A09        | 4400001      | 4460000    | <i>BnaA09g08940D</i> | <i>Bra037283</i>     | <i>AT2G17040</i>   | NAC domain containing protein 36                   | leaf morphogenesis; negative regulate cell size         |
| A09        | 4400001      | 4460000    | <i>BnaA09g08950D</i> | <i>Bra037283</i>     | <i>AT2G17040</i>   | NAC domain containing protein 36                   | leaf morphogenesis; negative regulate cell size         |
| C04        | 6750001      | 6780000    | <i>BnaC04g09000D</i> | <i>Bo4g034840</i>    | <i>AT3G52770</i>   | binding protein                                    | adaxial/abaxial axis specification; leaf shaping; leaf  |
| C06        | 30320001     | 30350000   | <i>BnaC06g29450D</i> | <i>Bo6g020110</i>    | <i>AT1G68310</i>   | MIP18 family protein (DUF59)                       | leaf adaxial–abaxial polarity formation                 |

**Supplementary Table 7.** Selected candidate genes for spring rapeseed diversification.

| Chr | Start    | End      | Gene                 | Br/Bo Homolog    | Ath Homolog      | Function                                 | Description                                             |
|-----|----------|----------|----------------------|------------------|------------------|------------------------------------------|---------------------------------------------------------|
| A01 | 21450001 | 21510000 | <i>BnaA01g31660D</i> | <i>Bra034119</i> | <i>AT3G10490</i> | NAC domain containing protein 52         | flowering time control                                  |
| A03 | 8860001  | 8900000  | <i>BnaA03g18840D</i> | <i>Bra000165</i> | <i>AT2G40080</i> | EARLY FLOWERING-like protein (DUF1313)   | early flowering                                         |
| A03 | 24340001 | 24370000 | <i>BnaA03g47480D</i> | <i>Bra019158</i> | <i>AT4G25530</i> | FLOWERING WAGENINGEN                     | flowering control                                       |
| A03 | 26620001 | 26650000 | <i>BnaA03g51290D</i> | <i>Bra024023</i> | <i>AT4G31120</i> | SHK1 binding protein 1                   | vernalization                                           |
| A05 | 9110001  | 9170000  | <i>BnaA05g14670D</i> | <i>Bra038101</i> | <i>AT1G53160</i> | squamosa promoter binding protein-like 4 | flower development ; vegetative phase change            |
| A05 | 11740001 | 11780000 | <i>BnaA05g17020D</i> | <i>Bra040834</i> | <i>AT3G22590</i> | PLANT HOMOLOGOUS TO PARAFIBROMIN         | transition from vegetative growth to flowering          |
| A06 | 3080001  | 3110000  | .                    | .                | <i>PHYA</i>      |                                          | Schiessl <i>et al.</i> 2014 <sup>2</sup>                |
| A06 | 3470001  | 3510000  | <i>BnaA06g06380D</i> | <i>Bra019923</i> | <i>AT1G10570</i> | Cysteine proteinases superfamily protein | vegetative to reproductive phase transition of meristem |
| A06 | 6510001  | 6570000  | <i>BnaA06g12580D</i> | .                | <i>AT1G18450</i> | actin-related protein 4                  | early flowering; long-day photoperiodism                |
| A07 | 15060001 | 15130000 | <i>BnaA07g18530D</i> | <i>Bra003390</i> | <i>AT3G59790</i> | MAP kinase 10                            | mutant has late flowering in long days                  |
| A07 | 15740001 | 15910000 | <i>BnaA07g19990D</i> | <i>Bra003578</i> | <i>AT1G80680</i> | SUPPRESSOR OF AUXIN RESISTANCE 3         | mutant has early-flowering phenotype                    |
| A07 | 17200001 | 17280000 | <i>BnaA07g22720D</i> | .                | <i>AT1G73310</i> | serine carboxypeptidase-like 4           | Schiessl <i>et al.</i> 2017 <sup>3</sup>                |
| A07 | 17840001 | 17950000 | <i>BnaA07g23960D</i> | <i>Bra003965</i> | <i>AT1G70170</i> | matrix metalloproteinase                 | mutant has late flowering                               |
| A07 | 22930001 | 22970000 | <i>BnaA07g33460D</i> | <i>Bra015678</i> | <i>AT1G77300</i> | histone-lysine N-methyltransferase       | early flower in short days; inhibitor of flowering      |

|     |          |          |                      |                   |                  |                                             |                                                                              |
|-----|----------|----------|----------------------|-------------------|------------------|---------------------------------------------|------------------------------------------------------------------------------|
| A07 | 22930001 | 22970000 | .                    | .                 | <i>EFS</i>       |                                             | Schiessl <i>et al.</i> 2014 <sup>2</sup>                                     |
| A09 | 18540001 | 18570000 | <i>BnaA09g25530D</i> | <i>Bra023153</i>  | <i>AT1G30970</i> | zinc finger (C2H2 type)<br>family protein   | delayed flowering in winter-<br>annual Arabidopsis                           |
| A09 | 18540001 | 18570000 | .                    | .                 | <i>SUF4</i>      |                                             | Schiessl <i>et al.</i> 2014 <sup>2</sup>                                     |
| C01 | 14790001 | 14840000 | <i>BnaC01g21240D</i> | <i>Bo1g052990</i> | <i>AT4G17060</i> | FRIGIDA interacting protein<br>2            | a major determinant of natural<br>variation in Arabidopsis<br>flowering time |
| C02 | 3100001  | 3210000  | <i>BnaC02g05910D</i> | <i>Bo2g012420</i> | <i>AT5G15160</i> | BANQUO 2                                    | regulation of flowering time                                                 |
| C03 | 9610001  | 9640000  | <i>BnaC03g18800D</i> | <i>Bo3g027460</i> | <i>AT2G33810</i> | squamosa promoter binding<br>protein-like 3 | regulation of flowering and<br>vegetative phase change                       |
| C03 | 9610001  | 9640000  | .                    | .                 | <i>SPL3</i>      |                                             | Schiessl <i>et al.</i> 2014 <sup>2</sup>                                     |
| C04 | 3750001  | 3770000  | <i>BnaC04g05320D</i> | <i>Bo4g025620</i> | <i>AT2G40080</i> | EARLY FLOWERING-like<br>protein (DUF1313)   | early flowering                                                              |
| C09 | 18450001 | 18490000 | <i>BnaC09g21160D</i> | <i>Bo9g072870</i> | <i>AT2G03070</i> | mediator subunit 8                          | regulation of flower development                                             |

“.”: No corresponding gene identified.

**Supplementary Table 8.** The 22 genes under selective sweeps among all genetic clusters.

| Gene                 | Chr | Start    | End      | Size  | Br/Bo Homolog     | Ath Homolog      | Sources                             | Function                                      |
|----------------------|-----|----------|----------|-------|-------------------|------------------|-------------------------------------|-----------------------------------------------|
| <i>BnaA03g12070D</i> |     |          |          |       | .                 | .                | Chalhoub <i>et al.</i> <sup>4</sup> | .                                             |
| <i>BnaA03g12080D</i> | A03 | 5460001  | 5470000  | 10000 | <i>Bra029048</i>  | .                | Chalhoub <i>et al.</i> <sup>4</sup> | .                                             |
| <i>BnaA03g12090D</i> |     |          |          |       | <i>Bra029049</i>  | <i>AT5G54060</i> | Chalhoub <i>et al.</i> <sup>4</sup> | UDP-glucose:flavonoid 3-o-glucosyltransferase |
| <i>BnaC02g12010D</i> | C02 | 7410001  | 7420000  | 10000 | <i>Bo2g032950</i> | .                | Chalhoub <i>et al.</i> <sup>4</sup> | .                                             |
| <i>BnaC02g12020D</i> |     |          |          |       | <i>Bo7g014750</i> | .                | Blast                               | .                                             |
| <i>BnaC04g17220D</i> | C04 | 15260001 | 15280000 | 20000 | <i>Bo4g076870</i> | <i>AT2G26770</i> | Chalhoub <i>et al.</i> <sup>4</sup> | pectin-like protein                           |
| <i>BnaC05g16920D</i> |     |          |          |       | <i>Bo5g034620</i> | <i>AT1G21630</i> | Chalhoub <i>et al.</i> <sup>4</sup> | Calcium-binding EF hand family protein        |
| <i>BnaC05g16930D</i> |     |          |          |       | <i>Bo5g034630</i> | <i>AT1G21640</i> | Chalhoub <i>et al.</i> <sup>4</sup> | NAD kinase 2                                  |
| <i>BnaC05g16940D</i> |     |          |          |       | <i>Bo5g034640</i> | <i>AT1G21651</i> | Chalhoub <i>et al.</i> <sup>4</sup> | zinc ion binding protein                      |
| <i>BnaC05g16950D</i> | C05 | 10630001 | 10660000 | 30000 | <i>Bo5g034640</i> | .                | Blast                               | .                                             |
| <i>BnaC05g16960D</i> |     |          |          |       | <i>Bo5g034640</i> | .                | Blast                               | .                                             |
| <i>BnaC05g16970D</i> |     |          |          |       | <i>Bo5g034650</i> | .                | Chalhoub <i>et al.</i> <sup>4</sup> | .                                             |
| <i>BnaC05g16980D</i> |     |          |          |       | <i>Bo5g034660</i> | <i>AT1G21660</i> | Chalhoub <i>et al.</i> <sup>4</sup> | Chaperone DnaJ-domain superfamily protein     |
| <i>BnaC05g25450D</i> |     |          |          |       | <i>Bo5g071090</i> | .                | Chalhoub <i>et al.</i> <sup>4</sup> | .                                             |
| <i>BnaC05g25460D</i> |     |          |          |       | <i>Bo5g071100</i> | .                | Chalhoub <i>et al.</i> <sup>4</sup> | .                                             |
| <i>BnaC05g25470D</i> | C05 | 20440001 | 20470000 | 30000 | <i>Bo5g071120</i> | <i>AT1G47330</i> | Chalhoub <i>et al.</i> <sup>4</sup> | methyltransferase%2C putative (DUF21)         |
| <i>BnaC05g25480D</i> |     |          |          |       | <i>Bo5g071130</i> | .                | Chalhoub <i>et al.</i> <sup>4</sup> | .                                             |
| <i>BnaC05g25490D</i> |     |          |          |       | <i>Bo5g071150</i> | .                | Chalhoub <i>et al.</i> <sup>4</sup> | .                                             |
| <i>BnaC06g22290D</i> |     |          |          |       | <i>Bo6g040610</i> | <i>AT1G75580</i> | Chalhoub <i>et al.</i> <sup>4</sup> | SAUR-like auxin-responsive protein family     |
| <i>BnaC06g22300D</i> | C06 | 24320001 | 24350000 | 30000 | <i>Bo6g040600</i> | <i>AT1G75550</i> | Chalhoub <i>et al.</i> <sup>4</sup> | glycine-rich protein                          |
| <i>BnaC06g22310D</i> |     |          |          |       | <i>Bo6g040590</i> | <i>AT1G75540</i> | Chalhoub <i>et al.</i> <sup>4</sup> | salt tolerance homolog2                       |
| <i>BnaC06g22320D</i> |     |          |          |       | <i>Bo2g155140</i> | .                | Blast                               | .                                             |

“.”: No corresponding gene or annotation identified.

**Supplementary Table 9.** Summary of contaminated and mislabeled accessions.

| Sample ID | Accession  | Species                             | Cultivar         | Genome size | Level         | Reality            |
|-----------|------------|-------------------------------------|------------------|-------------|---------------|--------------------|
| 2035      | PI 204682  | <i>Brassica oleracea</i>            | No. 190          | 1.07        | cross-species | <i>B. rapa</i>     |
| 2062      | Ames 30186 | <i>Brassica napus</i>               | Tun222           | 1.03        | cross-species | <i>B. rapa</i>     |
| 2074      | PI 169075  | <i>Brassica napus</i>               |                  | 1.00        | cross-species | <i>B. rapa</i>     |
| 2075      | PI 169080  | <i>Brassica napus</i>               |                  | 0.95        | cross-species | <i>B. rapa</i>     |
| 2076      | PI 169083  | <i>Brassica napus</i>               |                  | 0.98        | cross-species | <i>B. rapa</i>     |
| 2080      | PI 251614  | <i>Brassica napus</i>               |                  | 0.97        | cross-species | <i>B. rapa</i>     |
| 2085      | PI 286418  | <i>Brassica napus</i>               |                  | 1.09        | cross-species | <i>B. rapa</i>     |
| 2086      | PI 357374  | <i>Brassica napus</i>               | Esenska Mesana   | 1.19        | cross-species | <i>B. oleracea</i> |
| 2095      | PI 443015  | <i>Brassica napus</i>               | Gry              | 2.28        | in-speices    | rutabaga           |
| 2096      | PI 458607  | <i>Brassica napus</i>               | Doon Major Swede | 2.76        | in-speices    | rutabaga           |
| 2136      | PI 633123  | <i>Brassica napus</i>               | E94197           | 0.88        | cross-species | <i>B. rapa</i>     |
| 2141      | PI 649135  | <i>Brassica napus</i>               | NU 41737         | 2.15        | cross-species | <i>B. juncea</i>   |
| 2142      | PI 649148  | <i>Brassica napus</i>               | G 32327          | 1.68        | cross-species | <i>B. rapa</i>     |
| 2143      | PI 649153  | <i>Brassica napus ssp. napus</i>    | Span             | 1.73        | cross-species | <i>B. rapa</i>     |
| 3003      | PI 502303  | <i>Brassica napus</i>               | AR-115           | 1.07        | cross-species | <i>B. rapa</i>     |
| 3046      | GT 080920  | <i>Brassica napus ssp. rapifera</i> | New Hakuran      | 2.42        | in-speices    | rapeseed           |
| 3048      | GT 060523  | <i>Brassica napus ssp. rapifera</i> | Ceres            | 2.34        | in-speices    | rapeseed           |
| 3072      | GT 050561  | <i>Brassica napus</i>               | CGN_07224        | 1.14        | cross-species | <i>B. rapa</i>     |
| 3129      | BRA3053    | <i>Brassica cretica</i>             |                  | 1.35        | cross-species | <i>B. oleracea</i> |
| 3130      | BRA3092    | <i>Brassica cretica</i>             |                  | 1.34        | cross-species | <i>B. oleracea</i> |
| 3140      | BRA2918    | <i>Brassica incana</i>              |                  | 1.46        | cross-species | <i>B. oleracea</i> |

**Supplementary Table 10.** SNP distributions of each genetic cluster in different SNP Groups.

| <b>Genetic cluster</b> | <b>Cluster size</b> | <b>Group I</b> | <b>Group II</b> | <b>Group III</b> | <b>Group IV</b> |
|------------------------|---------------------|----------------|-----------------|------------------|-----------------|
|                        |                     | 372,546        | 36,829          | 24,193           | 23,387          |
| WEAm                   | 23                  | 82,246         | 20,081          | 7,367            | 7,456           |
| S                      | 34                  | 83,849         | 21,377          | 8,114            | 7,697           |
| WEsA                   | 12                  | 104,299        | 22,599          | 9,083            | 8,975           |
| WeA                    | 17                  | 123,521        | 25,131          | 14,849           | 7,455           |
| SK                     | 19                  | 85,151         | 19,046          | 7,332            | 8,626           |
| R                      | 25                  | 102,043        | 22,879          | 11,266           | 6,390           |



**Supplementary Table 11.** NCBI accessions of the chloroplast and mitochondria reference genomes.

| <b>Species</b>           | <b>Chloroplast</b> | <b>Mitochondria</b> |
|--------------------------|--------------------|---------------------|
| <i>Brassica napus</i>    | NC_016734          | AP006444            |
| <i>Brassica oleracea</i> | KR233156           | NC_016118           |
| <i>Brassica rapa</i>     | NC_015139          | NC_016125           |
| <i>Brassica nigra</i>    | NC_030450          | NC_029182           |
| <i>Brassica juncea</i>   | KT581449           | NC_016123           |
| <i>Brassica carinata</i> | KX681672           | NC_016120           |

**Supplementary Table 12.** Summary of the selective sweep regions identified by XP-CLR and  $\pi$  ratio method.

| Genetic cluster | XP-CLR | $\pi$ ratio | Both |
|-----------------|--------|-------------|------|
| R               | 459    | 4215        | 420  |
| WEsA            | 616    | 4068        | 570  |
| WeA             | 500    | 4153        | 452  |
| S               | 498    | 4109        | 474  |
| SK              | 424    | 4083        | 412  |

WEsA: Winter rapeseed in Europe and South Asia; S: Spring rapeseed; SK: Siberian kale; R: Rutabaga; WeA: Winter rapeseed in East Asia.

### Supplementary References

1. Cheng, F. *et al.* Subgenome parallel selection is associated with morphotype diversification and convergent crop domestication in *Brassica rapa* and *Brassica oleracea*. *Nat. Genet.* **48**, 1218–1224 (2016).
2. Schiessl, S., Samans, B., Hüttel, B., Reinhard, R. & Snowdon, R. J. Capturing sequence variation among flowering-time regulatory gene homologs in the allopolyploid crop species *Brassica napus*. *Front. Plant Sci.* **5**, 404 (2014).
3. Schiessl, S., Huettel, B., Kuehn, D., Reinhardt, R. & Snowdon, R. Post-polyploidisation morphotype diversification associates with gene copy number variation. *Sci. Rep.* **7**, 41845 (2017).
4. Chalhoub, B. *et al.* Early allopolyploid evolution in the post-Neolithic *Brassica napus* oilseed genome. *Science* **345**, 950–953 (2014).
